# Supplementary material for: What’s all that racket! Soundscapes, phenology, and biodiversity in estuaries
Source: PLoS One. 2020 Sep 3;15(9):e0236874. doi: 10.1371/journal.pone.0236874 (PMC7470342; doi:10.1371/journal.pone.0236874)
Supplement: S5 Table — (XLSX) [file pone.0236874.s021.xlsx]

## Sheet: S5 Table
Family	Scientific name	Common name
Invertebrates
Alpheidae	Alpheus heterochaelis	Big clawed snapping shrimp*˒¹³˒²⁷
Loliginidae	Lolliguncula brevis	Brief squid
Portunidae	Callinectes sapidus	Blue crab
Squillidae	Squilla mantis	Mantis shrimp*˒⁵¹
Palaemonidae	Palaemonetes vulgaris	Grass shrimp
Fish
Atherinopsidae	Menidia menidia	Atlantic silverside
Belonidae	Strongylura marina	Atlantic needlefish
Blenniidae	Chasmodes bosquianus	Striped blenny
Carangidae	Oligoplites saurus	Leatherjack
Clupeidae	Alosa pseudoharengus	Blueback herring
Clupeidae	Dorosoma petenense	Threadfin shad
Cynoglossidae	Symphurus plagiusa	Blackcheek tonguefish
Diodontidae	Chilomycterus schoepfii	Striped burrfish
Elopidae	Elops saurus	Ladyfish
Engraulidae	Anchoa mitchilli	Bay anchovy
Ephippidae	Chaetodipterus faber	Atlantic spadefish
Fundulidae	Fundulus heteroclitus	Mummichog
Fundulidae	Fundulus majalis	Striped killifish
Gerreidae	Eucinostimus harengulus	Tidewater mojarra
Gerreidae	Diapterus auratus	Irish mojarra
Gobiidae	Ctenogobius boleosoma	Darter goby*˒¹¹
Gobiidae	Ctenogobius smaragdus	Emerald goby*˒¹¹
Gobiidae	Gobiosoma bosc	Naked goby*˒¹¹
Gobiidae	Microgobius thalassinus	Green goby*˒¹¹
Gobiidae	Evorthodus lyricus	Lyre goby*˒¹¹
Haemulidae	Orthopristis chrysoptera	Pigfish
Lutjanidae	Lutjanus griseus	Gray snapper
Lutjanidae	Lutjanus synagris	Lane snapper
Monacanthidae	Stephanolepis hispidus	Planehead filefish
Mugilidae	Mugil cephalus	Striped Mullet
Mugilidae	Mugil curema	White mullet
Paralichthyidae	Ancilopsetta omata	Ocellated flounder
Paralichthyidae	Citharichthys spilopterus	Bay whiff
Paralichthyidae	Etropus crossotus	Fringed flounder
Paralichthyidae	Paralichthys albiguttata	Gulf flounder
Paralichthyidae	Paralichthys dentatus	Summer flounder
Paralichthyidae	Paralichthys lethostigma	Southern flounder
Phycidae	Urophycis regia	Spotted hake*˒¹⁵
Sciaenidae	Bairdiella chrysoura	Silver perch*˒²⁰
Sciaenidae	Cynoscion nebulosus	Spotted seatrout*˒¹⁷˒²⁰
Sciaenidae	Cynoscion regalis	Weakfish*˒²⁹˒⁵²
Sciaenidae	Sciaenops ocellatus	Red drum*˒¹⁴˒¹⁶
Sciaenidae	Leiostomus xanthurus	Spot*˒⁵²
Sciaenidae	Pogonias cromis	Black drum*˒²⁰
Sciaenidae	Menticirrhus americanus	Southern kingfish
Sciaenidae	Micropogonias undulatus	Atlantic croaker*˒⁵²
Scombridae	Scomberomorus maculatus	Spanish mackerel
Serranidae	Centropristis philadelphica	Rock sea bass*˒¹⁵
Sparidae	Archosargus probatocephalus	Sheepshead
Sparidae	Lagodon rhomboides	Pinfish
Sphyraenidae	Sphyraena barracuda	Great barracuda
Stromateidae	Peprilus Triacanthus	American butterfish
Syngnathidae	Syngnathus fuscus	Northern pipefish
Syngnathidae	Syngnathus louisianae	Chain pipefish
Synodontidae	Synodus foetens	Inshore lizardfish
Tetraodontidae	Sphoeroides maculatus	Northern puffer
Trichiuridae	Trichiurus lepturus	Atlantic cutlassfish
Triglidae	Prionotus tribulus	Bighead searobin
Uranoscopidae	Astroscopus y-graecum	Southern stargazer
*Soniferous fish species. References of sound production are included.
